# Supplementary material for: Spatiotemporal distribution characteristics of physicochemical properties of waste plastics with different landfill age and depth
Source: Royal Society of Chemistry journal article supplement (doi:10.1039/d4em00799a), 2025-01-01
Supplement: d4em00799a1.pdf [file d4em00799a1.pdf]

## Supporting Information

# Spatiotemporal Distribution Characteristics of Physicochemical Properties for Waste Plastics with Different Landfill Age and Depth

Fei Yu<sup>1,2</sup>, Wei Chu<sup>1</sup>, Leilihe Zhang<sup>1</sup>, Youcai Zhao<sup>3</sup>, Jie Ma<sup>2,3,\*</sup>

<sup>1</sup> College of Oceanography and Ecological Science, Shanghai Ocean University, No  
999, Huchenghuan Road, Shanghai, 201306, PR. China

<sup>2</sup> School of Civil Engineering, Kashi University, Kashi 844000, PR. China

<sup>3</sup> Research Center for Environmental Functional Materials, College of Environmental  
Science and Engineering, Tongji University, 1239 Siping Road, Shanghai, 200092,  
P.R. China

**(1) Supplementary figures**

- Figure.S1. Geographical location of 8 sampling points.
- Figure S2. FTIR spectra of actual samples from landfills.
- Figure S3. Fourier infrared (FTIR) comparison plots for each sampling point.
- Figure S4. Hydroxyl index of waste plastics.
- Figure S5. Changes of PE waste plastics with landfill time for a landfill depth of 5m.
- Figure S6, Distribution of element proportion of waste plastics with landfill age.
- Figure S7, Distribution of element proportion of waste plastics with landfill depth.

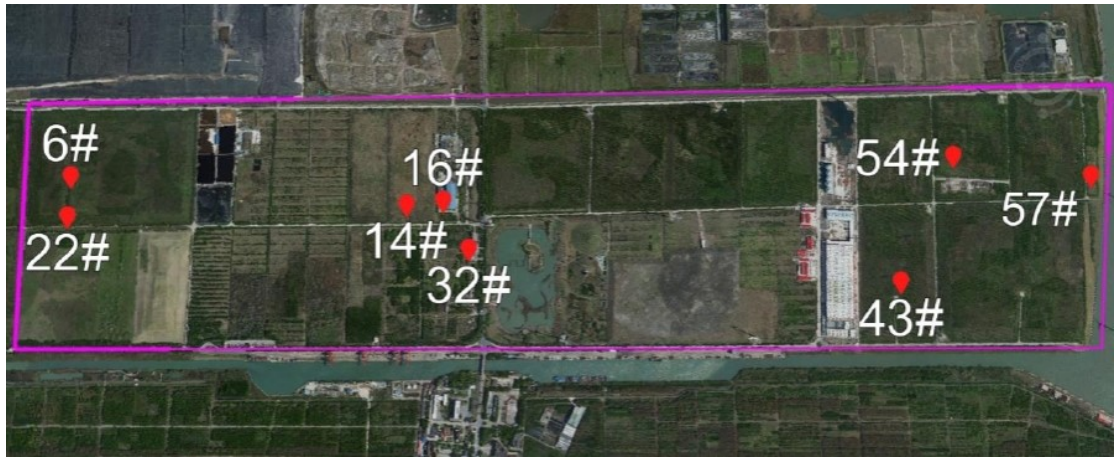

Figure.S1. Geographical location of 8 sampling points

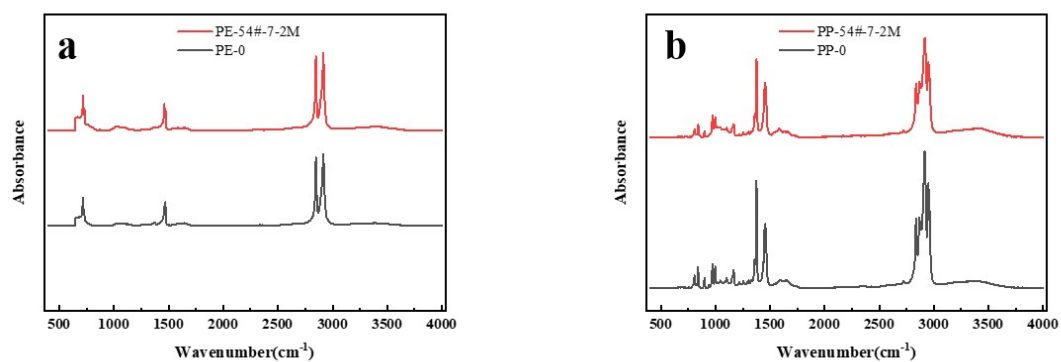

**Figure S2. FTIR spectra of actual samples from landfills.** (a) PE plastic; (b) PP plastic.  
(Notes: x# PE/PP-y-z, x represents the sampling point, y represents the age of the landfill, and z represents the depth of the landfill)

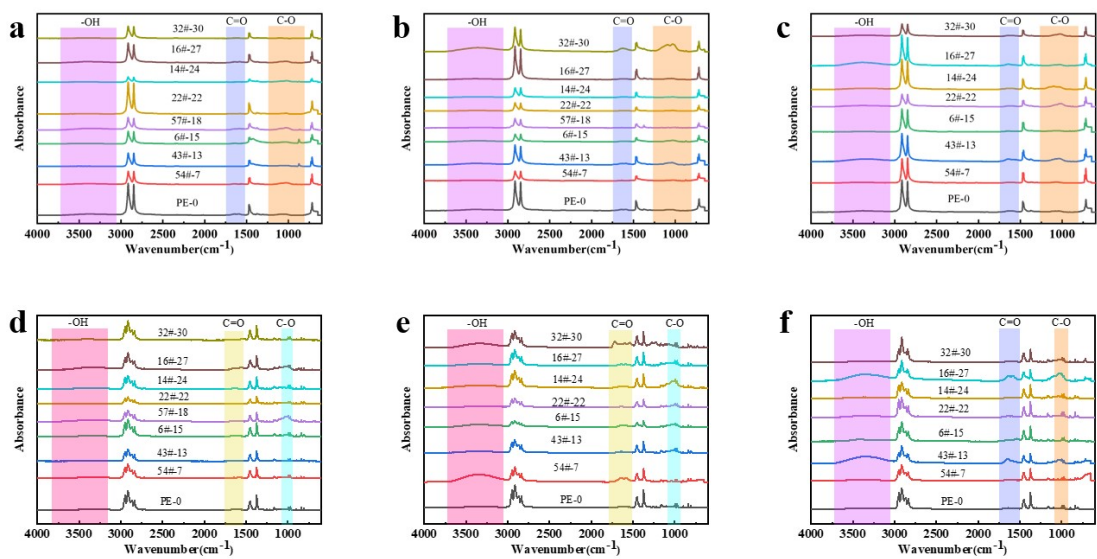

**Figure S3. Fourier infrared (FTIR) comparison plots for each sampling point.** (a) PE plastics with different landfill ages at 2m landfill depth; (b) PE plastics with different landfill ages at 5m landfill depth; (c) PE plastics with different landfill ages at 5m landfill depth; (d) PP plastics with different landfill ages at 2m landfill depth; (e) PP plastics with different landfill ages at 5m landfill depth; (f) PP plastics with different landfill ages at 8m landfill depth.

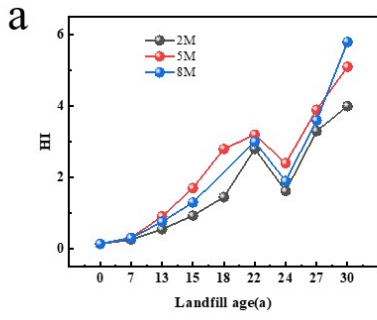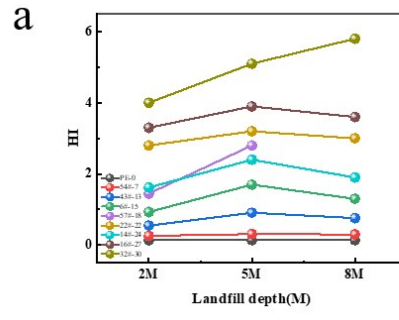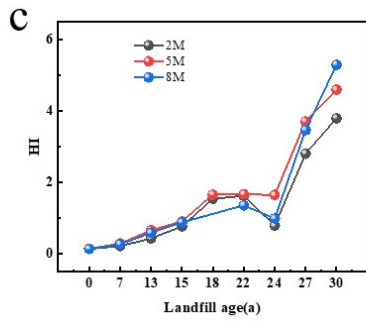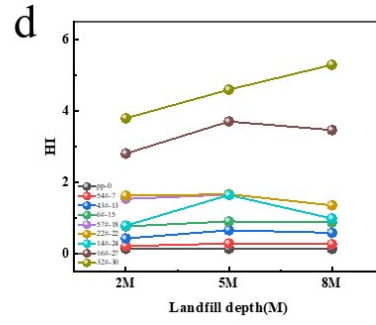

**Figure S4. Hydroxyl index of waste plastics.** (a) PE plastics with landfill time;(b) PE plastics with landfill depth; (c) PP plastics with landfill time ;(d) PP plastics with landfill depth.

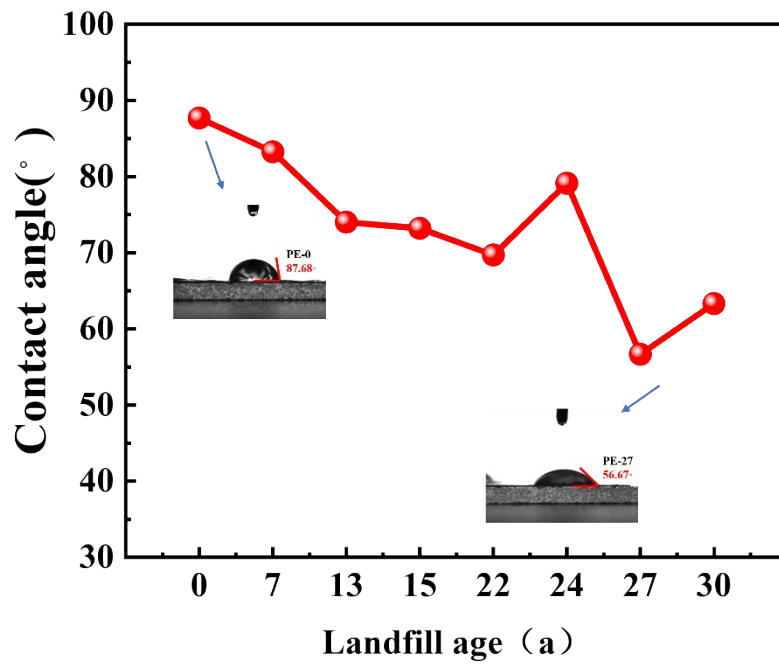

Figure S5. Changes of PE waste plastics with landfill time for a landfill depth of 5m.

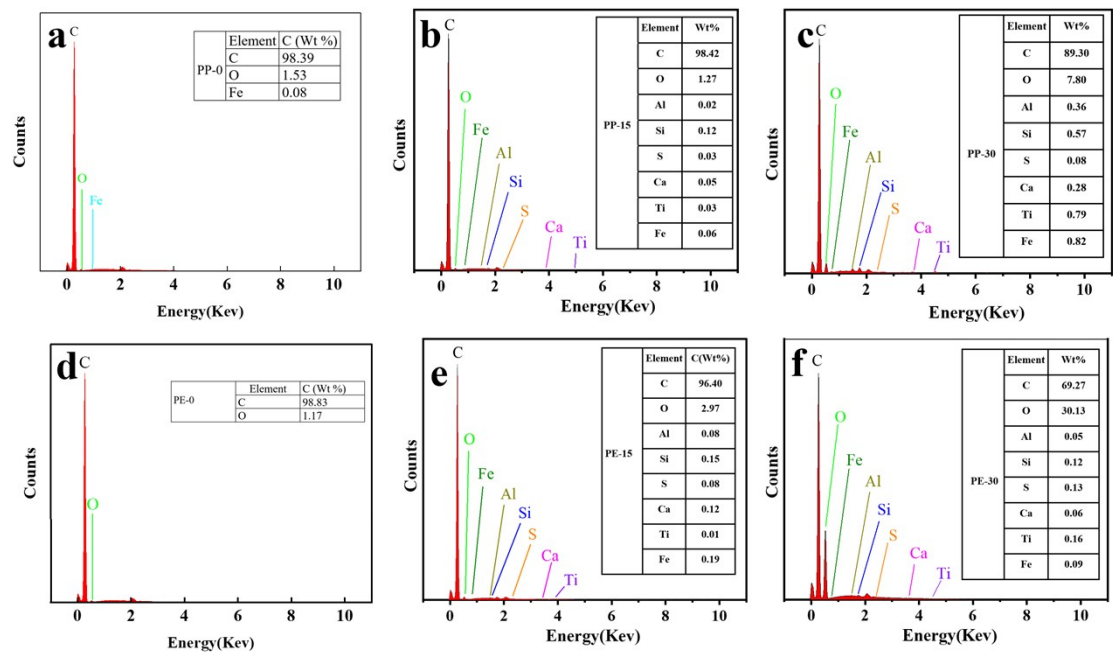

**Figure S6, Distribution of element proportion of waste plastics with landfill age.** (a) Virgin PP plastic;(b) Abandoned PP plastic buried for 15 years;(c) Abandoned PP plastic buried for 30 years;(d) Virgin PE plastic;(e) Abandoned PE plastic buried for 15 years;(f) Abandoned PE plastic buried for 30 years.



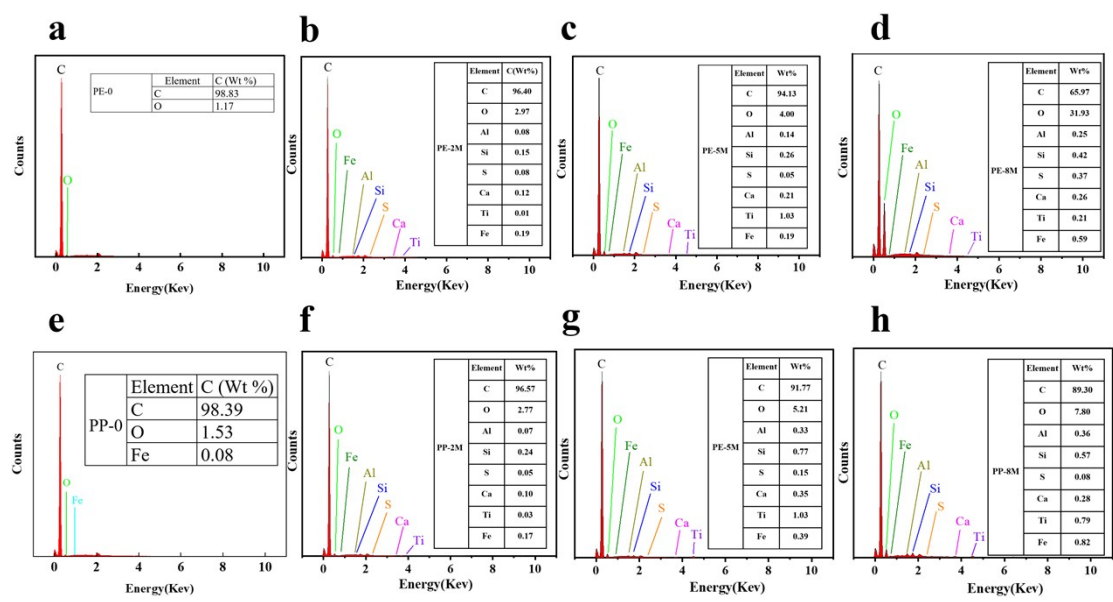

**Figure S7, Distribution of element proportion of waste plastics with landfill depth.** (a) virgin PE plastics; (b) waste PE plastics at 2m depth of landfill; (c) waste PE plastics at 5m depth of landfill; (d) waste PE plastics at 8m depth of landfill; (e) virgin PP plastics; (f) waste PP plastics at 2m depth of landfill; (g) waste PP plastics at 5m depth of landfill; (h) waste PP plastics at 2m depth of landfill.

## (2) Supplementary tables

Table s1 Details of sampling points

**Table s1 Details of sampling points**

| Sampling sites | Depth (m) | Landfill age(a) | Longitude | Latitude | Collection date |
|----------------|-----------|-----------------|-----------|----------|-----------------|
| 16#            | 2m        | 27              | 121.87107 | 31.04738 | January 11,2021 |
| 6#             | 2m        | 15              | 121.86666 | 31.05771 | January 12,2021 |
| 22#            | 2m        | 22              | 121.86539 | 31.05721 | January 12,2021 |
| 32#            | 2m        | 30              | 121.86991 | 31.04610 | January 13,2021 |
| 43/44#         | 2m        | 13              | 121.87480 | 31.04610 | January 13,2021 |
| 57#            | 2m        | 18              | 121.88087 | 31.03430 | January 13,2021 |
| 14#            | 2m        | 24              | 121.87044 | 31.03079 | January 17,2021 |
| 54#            | 2m        | 7               | 121.87961 | 31.04831 | January 19,2021 |
| 16#            | 5m        | 27              | 121.87107 | 31.03418 | January 11,2021 |
| 6#             | 5m        | 15              | 121.86666 | 31.04738 | January 12,2021 |
| 22#            | 5m        | 22              | 121.86539 | 31.05771 | January 12,2021 |
| 32#            | 5m        | 30              | 121.86991 | 31.05721 | January 13,2021 |
| 43/44#         | 5m        | 13              | 121.87480 | 31.04610 | January 13,2021 |
| 57#            | 5m        | 18              | 121.88087 | 31.04610 | January 13,2021 |
| 14#            | 5m        | 24              | 121.87044 | 31.03430 | January 17,2021 |
| 54#            | 5m        | 7               | 121.87961 | 31.03079 | January 19,2021 |
| 16#            | 8m        | 27              | 121.87107 | 31.04831 | January 11,2021 |
| 6#             | 8m        | 15              | 121.86666 | 31.04738 | January 12,2021 |
| 22#            | 8m        | 22              | 121.86539 | 31.05771 | January 12,2021 |
| 32#            | 8m        | 30              | 121.86991 | 31.05721 | January 13,2021 |
| 43/44#         | 8m        | 13              | 121.87480 | 31.04610 | January 13,2021 |
| 57#            | 8m        | 18              | 121.88087 | 31.04610 | January 13,2021 |
| 14#            | 8m        | 24              | 121.87044 | 31.03430 | January 17,2021 |
| 54#            | 8m        | 7               | 121.87961 | 31.03079 | January 19,2021 |
